# Supplementary material
Source: publisher figshare collection journal article supplement (https://gsajournals.figshare.com/ndownloader/files/12879107)
Supplement: Supplementary file 1 [file 12879107]

## Sheet: Sheet1
Table S1. Indel markers used for ten fine mapping
Marker	Primer seqence (5'-3')	Length (bp)	Ta (℃)	Polymorphism
IM1	CTAGTTTAATGCATCAGCTAGGTC	25	56.6	B73_197bp_27bp < ten_224bp
	CCTTTAAAGCTGGACCTCTAAG	22	56.6
IM2	TAATGTTAGCATCGGGCAATG	21	60.8	B73_215bp_21bp < ten_236bp
	TCAGGACACCCACGCAAC	18	61.8
IM3	CTGCAGGGACACCGTTTG	18	61.3	B73_190bp_24bp < ten_214bp
	GCAGGTGCATTTGTAATTCTG	21	58.3
IM4	CTTGGAGAAGATAACCTGAGACC	23	58.4	B73_101bp_15bp > ten_86bp
	GGAGTAGTTGATGGGCACG	19	59.1
IM5	TATCAAGGTGTAGCTCGCGAG	21	60.5	B73_145bp_19bp < ten_164bp
	GGACCGTTGGGTTCATCA	19	60.3
